# Supplementary material for: Targeting of CD44 eradicates human acute myeloid leukemic stem cells
Source: Springer Nature journal article supplement (doi:10.1038/nm1483), 2006-09-24
Supplement: nm1483-S4.pdf [file nm1483-S4.pdf]

# Supplementary Figure 4

**a** AML CD34<sup>+</sup>CD38<sup>-</sup> cells

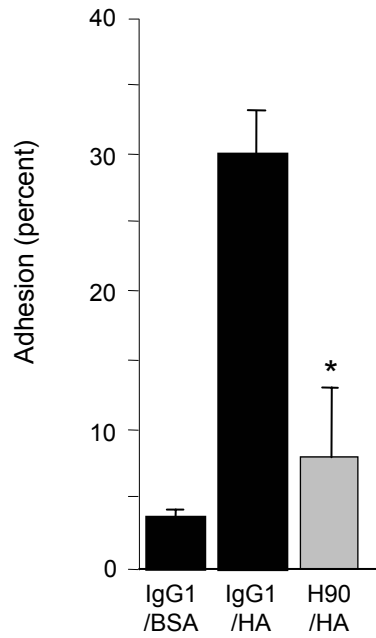

**b** BM CD34<sup>+</sup>CD38<sup>-</sup> cells

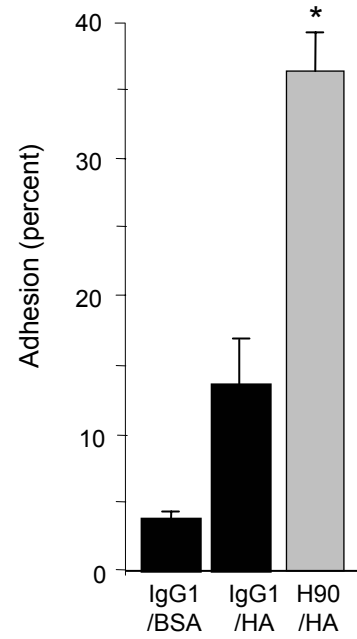

**Supplemental Figure 4. Effect of H90 on adhesion of primitive AML and normal BM cells to HA.** Percent of input AML (a) and BM (b) CD34<sup>+</sup>CD38<sup>-</sup> cells that adhere to immobilized BSA or HA layers. Bars represent percent adhesion of cells treated with IgG1 on BSA (black, on left), IgG1 on HA (black, middle) and H90 on HA (grey).  $n = 5$  AML patient samples and  $n = 4$  BM samples. Values represent mean  $\pm$  s.e.m. from one representative out of four independent experiments. \*,  $P < 0.05$  between IgG1 and H90 treated group on HA.
